# Supplementary material for: Symmetry breaking in the planar configurations of disilicon tetrahalides: Pseudo-Jahn–Teller effect parameters, hardness and electronegativity
Source: Royal Society of Chemistry journal article supplement (doi:10.1039/c5cp04216j), 2015-01-01
Supplement: c5cp04216j1.pdf [file c5cp04216j1.pdf]

*Supplementary Information*

**Symmetry breaking in the planar configurations of disilicontetrahalides. Pseudo Jahn-Teller effect parameters, hardness and electronegativity**

Ghazaleh Kouchakzadeh and Davood Nori-Shargh\*

**Table SI-1.** LC-BLYP/Def2-TZVPP, LC- $\omega$ PBE/Def2-TZVPP and B3LYP/Def2-TZVPP calculated corrected electronic energies ( $E_0 = E_{el} + ZPE$ ) [zero point energies ( $ZPE$ ) from B3LYP/Def2-TZVPP level] for the planar ( $D_{2h}$  symmetry) and bent ( $C_{2h}$  symmetry) geometries of compounds **1-4**.

| Method              | LC-BLYP/Def2-TZVPP |               |                | LC- $\omega$ PBE/Def2-TZVPP |               |                | B3LYP/Def2-TZVPP |               |                |
|---------------------|--------------------|---------------|----------------|-----------------------------|---------------|----------------|------------------|---------------|----------------|
|                     | $ZPE$              | $E_0$         | $\Delta E_0^a$ | $ZPE$                       | $E_0$         | $\Delta E_0^a$ | $ZPE$            | $E_0$         | $\Delta E_0^a$ |
| <b>compound</b>     |                    |               |                |                             |               |                |                  |               |                |
| <b>1</b> , $C_{2h}$ | 0.010945           | -977.720106   | 0.00           | 0.011243                    | -978.325617   | 0.00           | 0.011062         | -978.789737   | 0.00           |
| <b>1</b> , $D_{2h}$ | 0.013279           | -977.672125   | 30.11          | 0.012978                    | -978.282672   | 26.95          | 0.012652         | -978.731386   | 36.62          |
| <b>2</b> , $C_{2h}$ | 0.007894           | -2418.519307  | 0.00           | 0.007967                    | -2419.291896  | 0.00           | 0.007288         | -2420.099696  | 0.00           |
| <b>2</b> , $D_{2h}$ | 0.008782           | -2418.503821  | 9.72           | 0.008707                    | -2419.278261  | 8.56           | 0.008152         | -2420.069176  | 19.15          |
| <b>3</b> , $C_{2h}$ | 0.006303           | -10873.755558 | 0.00           | 0.006360                    | -10874.132689 | 0.00           | 0.005644         | -10875.913622 | 0.00           |
| <b>3</b> , $D_{2h}$ | 0.006971           | -10873.743436 | 7.61           | 0.006902                    | -10874.122226 | 6.56           | 0.006350         | -10875.885970 | 17.35          |
| <b>4</b> , $C_{2h}$ | 0.005534           | -1768.549434  | 0.00           | 0.005588                    | -1769.887986  | 0.00           | 0.004864         | -1770.373083  | 0.00           |
| <b>4</b> , $D_{2h}$ | 0.005878           | -1768.542280  | 4.49           | 0.005848                    | -1769.881968  | 3.78           | 0.005336         | -1770.351212  | 13.72          |

**Table SI-2.** Calculated structural parameters of the planar ( $D_{2h}$ ) and *trans*-bent ( $C_{2h}$ ) geometries of compounds **1-4**.

| Compound                                                        | <b>1</b>                                                                                     |                                                                      | <b>2</b>                                                             |                                                                                              | <b>3</b>                                                             |                                                                      | <b>4</b>                                                             |                                                                      |
|-----------------------------------------------------------------|----------------------------------------------------------------------------------------------|----------------------------------------------------------------------|----------------------------------------------------------------------|----------------------------------------------------------------------------------------------|----------------------------------------------------------------------|----------------------------------------------------------------------|----------------------------------------------------------------------|----------------------------------------------------------------------|
|                                                                 | $D_{2h}$                                                                                     | $C_{2h}$                                                             | $D_{2h}$                                                             | $C_{2h}$                                                                                     | $D_{2h}$                                                             | $C_{2h}$                                                             | $D_{2h}$                                                             | $C_{2h}$                                                             |
| <b>Bond lengths (Å)</b>                                         |                                                                                              |                                                                      |                                                                      |                                                                                              |                                                                      |                                                                      |                                                                      |                                                                      |
| $r_{\text{Si-Si}}$                                              | (2.049) <sup>a</sup><br>(2.064) <sup>b</sup><br>(2.084) <sup>c</sup><br>(2.048) <sup>d</sup> | (2.844) <sup>a</sup><br>(2.641) <sup>b</sup><br>(2.638) <sup>c</sup> | (2.069) <sup>a</sup><br>(2.083) <sup>b</sup><br>(2.113) <sup>c</sup> | (2.329) <sup>a</sup><br>(2.311) <sup>b</sup><br>(2.426) <sup>c</sup><br>(2.343) <sup>e</sup> | (2.076) <sup>a</sup><br>(2.090) <sup>b</sup><br>(2.123) <sup>c</sup> | (2.290) <sup>a</sup><br>(2.273) <sup>b</sup><br>(2.404) <sup>c</sup> | (2.088) <sup>a</sup><br>(2.101) <sup>b</sup><br>(2.140) <sup>c</sup> | (2.227) <sup>a</sup><br>(2.220) <sup>b</sup><br>(2.365) <sup>c</sup> |
| $r_{\text{Si-X}}$                                               | (1.570) <sup>a</sup><br>(1.581) <sup>b</sup><br>(1.584) <sup>c</sup><br>(1.591) <sup>d</sup> | (1.588) <sup>a</sup><br>(1.598) <sup>b</sup><br>(1.604) <sup>c</sup> | (2.006) <sup>a</sup><br>(2.012) <sup>b</sup><br>(2.036) <sup>c</sup> | (2.035) <sup>a</sup><br>(2.038) <sup>b</sup><br>(2.076) <sup>c</sup><br>(2.056) <sup>e</sup> | (2.164) <sup>a</sup><br>(2.170) <sup>b</sup><br>(2.204) <sup>c</sup> | (2.194) <sup>a</sup><br>(2.197) <sup>b</sup><br>(2.249) <sup>c</sup> | (2.381) <sup>a</sup><br>(2.385) <sup>b</sup><br>(2.429) <sup>c</sup> | (2.409) <sup>a</sup><br>(2.409) <sup>b</sup><br>(2.477) <sup>c</sup> |
| $\Delta[r_{\text{Si-Si}}(C_{2h}) - r_{\text{Si-Si}}(D_{2h})]^a$ | 0.795                                                                                        |                                                                      | 0.260                                                                |                                                                                              | 0.214                                                                |                                                                      | 0.139                                                                |                                                                      |
| $\Delta[r_{\text{Si-Si}}(C_{2h}) - r_{\text{Si-Si}}(D_{2h})]^b$ | 0.577                                                                                        |                                                                      | 0.228                                                                |                                                                                              | 0.183                                                                |                                                                      | 0.119                                                                |                                                                      |
| $\Delta[r_{\text{Si-Si}}(C_{2h}) - r_{\text{Si-Si}}(D_{2h})]^c$ | 0.554                                                                                        |                                                                      | 0.313                                                                |                                                                                              | 0.281                                                                |                                                                      | 0.225                                                                |                                                                      |
| <b>Bond angles (°)</b>                                          |                                                                                              |                                                                      |                                                                      |                                                                                              |                                                                      |                                                                      |                                                                      |                                                                      |
| $\theta_{\text{X-Si-Si}}$                                       | (125.5) <sup>a</sup><br>(125.3) <sup>b</sup><br>(125.1) <sup>c</sup>                         | (105.5) <sup>a</sup><br>(106.6) <sup>b</sup><br>(106.7) <sup>c</sup> | (123.6) <sup>a</sup><br>(123.2) <sup>b</sup><br>(123.0) <sup>c</sup> | (111.6) <sup>a</sup><br>(112.1) <sup>b</sup><br>(110.2) <sup>c</sup>                         | (122.8) <sup>a</sup><br>(122.7) <sup>b</sup><br>(122.5) <sup>c</sup> | (112.3) <sup>a</sup><br>(112.8) <sup>b</sup><br>(110.4) <sup>c</sup> | (121.8) <sup>a</sup><br>(121.7) <sup>b</sup><br>(121.7) <sup>c</sup> | (113.9) <sup>a</sup><br>(114.2) <sup>b</sup><br>(111.1) <sup>c</sup> |
| $\theta_{\text{X-Si-X}}$                                        | (109.1) <sup>a</sup><br>(109.5) <sup>b</sup><br>(109.8) <sup>c</sup><br>(109.7) <sup>d</sup> | (101.3) <sup>a</sup><br>(102.3) <sup>b</sup><br>(102.8) <sup>c</sup> | (113.3) <sup>a</sup><br>(113.5) <sup>b</sup><br>(114.0) <sup>c</sup> | (106.1) <sup>a</sup><br>(106.8) <sup>b</sup><br>(106.1) <sup>c</sup>                         | (114.4) <sup>a</sup><br>(114.6) <sup>b</sup><br>(115.1) <sup>c</sup> | (107.6) <sup>a</sup><br>(108.2) <sup>b</sup><br>(107.3) <sup>c</sup> | (116.3) <sup>a</sup><br>(116.6) <sup>b</sup><br>(116.7) <sup>c</sup> | (110.4) <sup>a</sup><br>(110.9) <sup>b</sup><br>(109.0) <sup>c</sup> |
| <b>Torsion angles (°)</b>                                       |                                                                                              |                                                                      |                                                                      |                                                                                              |                                                                      |                                                                      |                                                                      |                                                                      |
| $\theta_{\text{X-Si-Si-X}}$                                     | (0.0) <sup>a</sup><br>(0.0) <sup>b</sup><br>(0.0) <sup>c</sup>                               | (73.3) <sup>a</sup><br>(71.3) <sup>b</sup><br>(70.5) <sup>c</sup>    | (0.0) <sup>a</sup><br>(0.0) <sup>b</sup><br>(0.0) <sup>c</sup>       | (61.5) <sup>a</sup><br>(60.0) <sup>b</sup><br>(63.3) <sup>c</sup>                            | (0.0) <sup>a</sup><br>(0.0) <sup>b</sup><br>(0.0) <sup>c</sup>       | (58.6) <sup>a</sup><br>(57.0) <sup>b</sup><br>(61.5) <sup>c</sup>    | (0.0) <sup>a</sup><br>(0.0) <sup>b</sup><br>(0.0) <sup>c</sup>       | (52.2) <sup>a</sup><br>(50.8) <sup>b</sup><br>(58.4) <sup>c</sup>    |
| <b>Flap Angles (°)</b>                                          |                                                                                              |                                                                      |                                                                      |                                                                                              |                                                                      |                                                                      |                                                                      |                                                                      |
|                                                                 | (0.0) <sup>a</sup><br>(0.0) <sup>b</sup><br>(0.0) <sup>c</sup>                               | (65.1) <sup>a</sup><br>(62.9) <sup>b</sup><br>(62.4) <sup>c</sup>    | (0.0) <sup>a</sup><br>(0.0) <sup>b</sup><br>(0.0) <sup>c</sup>       | (52.3) <sup>a</sup><br>(51.0) <sup>b</sup><br>(55.1) <sup>c</sup>                            | (0.0) <sup>a</sup><br>(0.0) <sup>b</sup><br>(0.0) <sup>c</sup>       | (50.0) <sup>a</sup><br>(48.6) <sup>b</sup><br>(53.9) <sup>c</sup>    | (0.0) <sup>a</sup><br>(0.0) <sup>b</sup><br>(0.0) <sup>c</sup>       | (44.8) <sup>a</sup><br>(43.7) <sup>b</sup><br>(51.6) <sup>c</sup>    |

<sup>a</sup> From LC-BLYP/Def2-TZVPP [this work]. <sup>b</sup> From LC-wPBE/Def2-TZVPP [this work].  
<sup>c</sup> From B3LYP/Def2-TZVPP [this work]. <sup>d</sup> From HF/DZd, see Ref. 15. <sup>e</sup>From MP2/6-31G(d,p), see Ref. 18.

**Table SI-3.** LC- $\omega$ PBE/Def2-TZVPP calculated energies (in hartree) of HOMO ( $\epsilon_{\text{HOMO}}$ ), LUMO ( $\epsilon_{\text{LUMO}}$ ),  $\epsilon_{\text{LUMO}} - \epsilon_{\text{HOMO}}$ , global hardness ( $\eta$ ), global electronegativity ( $\chi$ ),  $\Delta[\eta(C_{2h}) - \eta(D_{2h})]$  and  $\Delta[\chi(C_{2h}) - \chi(D_{2h})]$  parameters for the *trans*-bent ( $C_{2h}$ ) and planar ( $D_{2h}$ ) configurations of compounds **1-4**.

| compound            | $\epsilon_{\text{HOMO}}$ | $\epsilon_{\text{LUMO}}$ | $\epsilon_{\text{LUMO}} - \epsilon_{\text{HOMO}}$ | $I$     | $A$      | $\eta$  | $\chi$  | $\Delta[\eta(C_{2h}) - \eta(D_{2h})]$ | $\Delta[\chi(C_{2h}) - \chi(D_{2h})]$ |
|---------------------|--------------------------|--------------------------|---------------------------------------------------|---------|----------|---------|---------|---------------------------------------|---------------------------------------|
| <b>1</b> , $C_{2h}$ | -0.35420                 | -0.05145                 | 0.30275                                           | 0.35420 | 0.05145  | 0.15137 | 0.20282 | -0.01082(-6.79) <sup>a</sup>          | 0.05645 (35.4) <sup>a</sup>           |
| <b>1</b> , $D_{2h}$ | -0.30856                 | 0.01582                  | 0.32438                                           | 0.30856 | -0.01582 | 0.16219 | 0.14637 | 0.00000                               | 0.00000                               |
| <b>2</b> , $C_{2h}$ | -0.32112                 | -0.05677                 | 0.26435                                           | 0.32112 | 0.05677  | 0.13217 | 0.18894 | -0.02697(-16.92) <sup>a</sup>         | 0.04916 (30.8) <sup>a</sup>           |
| <b>2</b> , $D_{2h}$ | -0.29892                 | 0.01936                  | 0.31828                                           | 0.29892 | -0.01936 | 0.15914 | 0.13978 | 0.00000                               | 0.00000                               |
| <b>3</b> , $C_{2h}$ | -0.31539                 | -0.06006                 | 0.25533                                           | 0.31539 | 0.06006  | 0.12766 | 0.18772 | -0.02132 (-13.38) <sup>a</sup>        | 0.03994 (25.1) <sup>a</sup>           |
| <b>3</b> , $D_{2h}$ | -0.29676                 | 0.00120                  | 0.29796                                           | 0.29676 | -0.00120 | 0.14898 | 0.14778 | 0.00000                               | 0.00000                               |
| <b>4</b> , $C_{2h}$ | -0.30234                 | -0.05751                 | 0.24483                                           | 0.30234 | 0.05751  | 0.12241 | 0.12241 | -0.01364(-8.56) <sup>a</sup>          | 0.03093(19.4) <sup>a</sup>            |
| <b>4</b> , $D_{2h}$ | -0.28939                 | -0.01729                 | 0.27210                                           | 0.28939 | 0.01729  | 0.13605 | 0.15334 | 0.00000                               | 0.00000                               |

**Table SI-4.** LC-BLYP/Def2-TZVPP calculated energies (in hartree) of HOMO ( $\varepsilon_{\text{HOMO}}$ ), LUMO ( $\varepsilon_{\text{LUMO}}$ ),  $\varepsilon_{\text{LUMO}} - \varepsilon_{\text{HOMO}}$ , global hardness ( $\eta$ ), global electronegativity ( $\chi$ ),  $\Delta[\eta(C_{2h}) - \eta(D_{2h})]$  and  $\Delta[\chi(C_{2h}) - \chi(D_{2h})]$  parameters for the *trans*-bent ( $C_{2h}$ ) and planar ( $D_{2h}$ ) configurations of compounds **1-4**.

| compound            | $\varepsilon_{\text{HOMO}}$ | $\varepsilon_{\text{LUMO}}$ | $\varepsilon_{\text{LUMO}} - \varepsilon_{\text{HOMO}}$ | $I$     | $A$      | $\eta$  | $\chi$  | $\Delta[\eta(C_{2h}) - \eta(D_{2h})]$ | $\Delta[\chi(C_{2h}) - \chi(D_{2h})]$ |
|---------------------|-----------------------------|-----------------------------|---------------------------------------------------------|---------|----------|---------|---------|---------------------------------------|---------------------------------------|
| <b>1</b> , $C_{2h}$ | -0.36963                    | -0.04456                    | 0.32507                                                 | 0.36963 | 0.04456  | 0.16254 | 0.20709 | -0.00259(-1.63) <sup>a</sup>          | 0.06065 (38.1) <sup>a</sup>           |
| <b>1</b> , $D_{2h}$ | -0.31156                    | 0.01869                     | 0.33025                                                 | 0.31156 | -0.01869 | 0.16513 | 0.14644 | 0.00000                               | 0.00000                               |
| <b>2</b> , $C_{2h}$ | -0.32517                    | -0.05638                    | 0.26879                                                 | 0.32517 | 0.05638  | 0.13439 | 0.19077 | -0.02867(-17.99) <sup>a</sup>         | 0.0532 (33.4) <sup>a</sup>            |
| <b>2</b> , $D_{2h}$ | -0.30062                    | 0.02549                     | 0.32611                                                 | 0.30062 | -0.02549 | 0.16306 | 0.13757 | 0.00000                               | 0.00000                               |
| <b>3</b> , $C_{2h}$ | -0.31961                    | -0.06074                    | 0.25887                                                 | 0.31961 | 0.06074  | 0.12943 | 0.19017 | -0.02258 (-14.17) <sup>a</sup>        | 0.04319 (27.1) <sup>a</sup>           |
| <b>3</b> , $D_{2h}$ | -0.29899                    | 0.00503                     | 0.30402                                                 | 0.29899 | -0.00503 | 0.15201 | 0.14698 | 0.00000                               | 0.00000                               |
| <b>4</b> , $C_{2h}$ | -0.30536                    | -0.05736                    | 0.24800                                                 | 0.30536 | 0.05736  | 0.12400 | 0.18136 | -0.01372 (-8.61) <sup>a</sup>         | 0.0278(17.4) <sup>a</sup>             |
| <b>4</b> , $D_{2h}$ | -0.29128                    | -0.01585                    | 0.27543                                                 | 0.29128 | 0.01585  | 0.13772 | 0.15357 | 0.00000                               | 0.00000                               |
